# Supplementary material for: Clinical Characteristics and In-Hospital Mortality According to Left Main and Non-Left Main Culprit Lesions ― Report From the Japan Acute Myocardial Infarction Registry (JAMIR) ―
Source: PubMed Central journal article supplement — Circ Rep. 2019 Nov 29;1(12):601–9. doi: 10.1253/circrep.CR-19-0056 (PMC7897686; doi:10.1253/circrep.cr-19-0056), 2019-11-29
Supplement: circrep-1-601-s001.pdf [file circrep-1-601-s001.pdf]

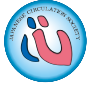

---

**Clinical Characteristics and In-Hospital Mortality  
According to Left Main and Non-Left Main Culprit Lesions**  
— Report From the Japan Acute Myocardial  
Infarction Registry (JAMIR) —

---

Kensaku Nishihira, MD, PhD; Sunao Kojima, MD, PhD; Misa Takegami, PhD;  
Satoshi Honda, MD, PhD; Yoko M. Nakao, MD, PhD; Jun Takahashi, MD, PhD;  
Tomonori Itoh, MD, PhD; Tetsu Watanabe, MD, PhD; Morimasa Takayama, MD, PhD;  
Hiroaki Shimokawa, MD, PhD; Tetsuya Sumiyoshi, MD, PhD; Kazuo Kimura, MD, PhD;  
Satoshi Yasuda, MD, PhD on behalf of the JAMIR Investigators

**Supplementary Table. Comparison of clinical characteristics of patients with LMCA ACS between JAMIR and other registries**

|                                     | <b>JAMIR</b> | <b>AMIS Plus Registry<sup>10</sup></b> | <b>GRACE<sup>11</sup></b>                               | <b>KAMIR<sup>12</sup></b>            | <b>Pappalardo A, et al.<sup>13</sup></b> | <b>ASTER<sup>16</sup></b>             |
|-------------------------------------|--------------|----------------------------------------|---------------------------------------------------------|--------------------------------------|------------------------------------------|---------------------------------------|
| Region                              | Japan        | Switzerland                            | North and South America, Europe, Australia, New Zealand | South Korea                          | Italy, United Kingdom                    | Singapore, South Korea, United States |
| Time period                         | 2011-2013    | 2005-2010                              | 2000-2007                                               | 2005-2008                            | 2005-2008                                | 2003-2012                             |
| Number of patients with LMCA ACS    | 404          | 348                                    | 1,799                                                   | 256                                  | 48                                       | 67                                    |
| Age, years                          | 71 (68-79)   | 63.5±12.6                              | 70 (60-78)                                              | 66±11                                | 70±12.5                                  | 64.2±12.8                             |
| Male, %                             | 80.9         | 75                                     | 72                                                      | 74.2                                 | 75                                       | 79.1                                  |
| STEMI, %                            | 67.8         | 100                                    | 35                                                      | 44.1                                 | 45                                       | 100                                   |
| Heart failure or Killip class ≥2, % | 62.4         | 29.9                                   | 23.7                                                    | NA                                   | NA                                       | NA                                    |
| Cardiogenic shock, %                | 33.3         | 12.2                                   | 1.8                                                     | 14.1                                 | 45                                       | 65.7                                  |
| Primary PCI rate, %                 | 75.8         | 100                                    | 28.5                                                    | 29 (PCI during hospitalization, 78%) | 100                                      | 100                                   |
| In-hospital mortality, %            | 23.3         | 10.9                                   | 7.7 (cardiogenic shock, 34%)                            | 16                                   | 21                                       | 47.8                                  |

Data expressed as mean (± standard deviation) or median (interquartile range). ACS, acute coronary syndrome; AMIS, Acute Myocardial Infarction in Switzerland; ASTER, the Asia-Pacific Left Main ST-Elevation Registry; GRACE, the Global Registry of Acute Coronary Events; JAMIR, Japan Acute Myocardial Infarction Registry; KAMIR, Korea Acute Myocardial Infarction Registry; NA, not available. Other abbreviations as in Table 1.

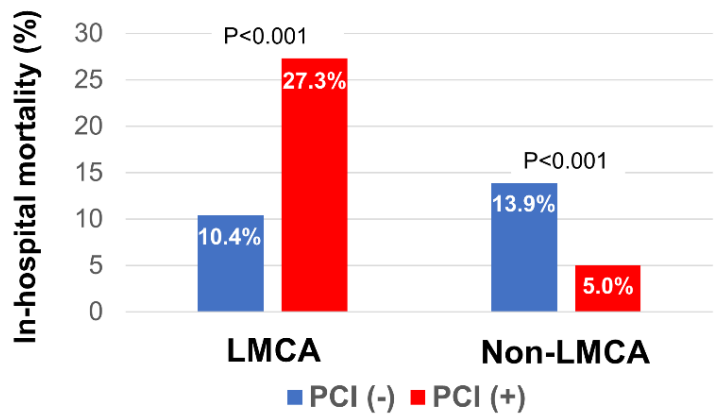

**Supplementary Figure 1.** In-hospital mortality in acute coronary syndrome patients according to left main coronary artery (LMCA) and percutaneous coronary intervention (PCI) status.

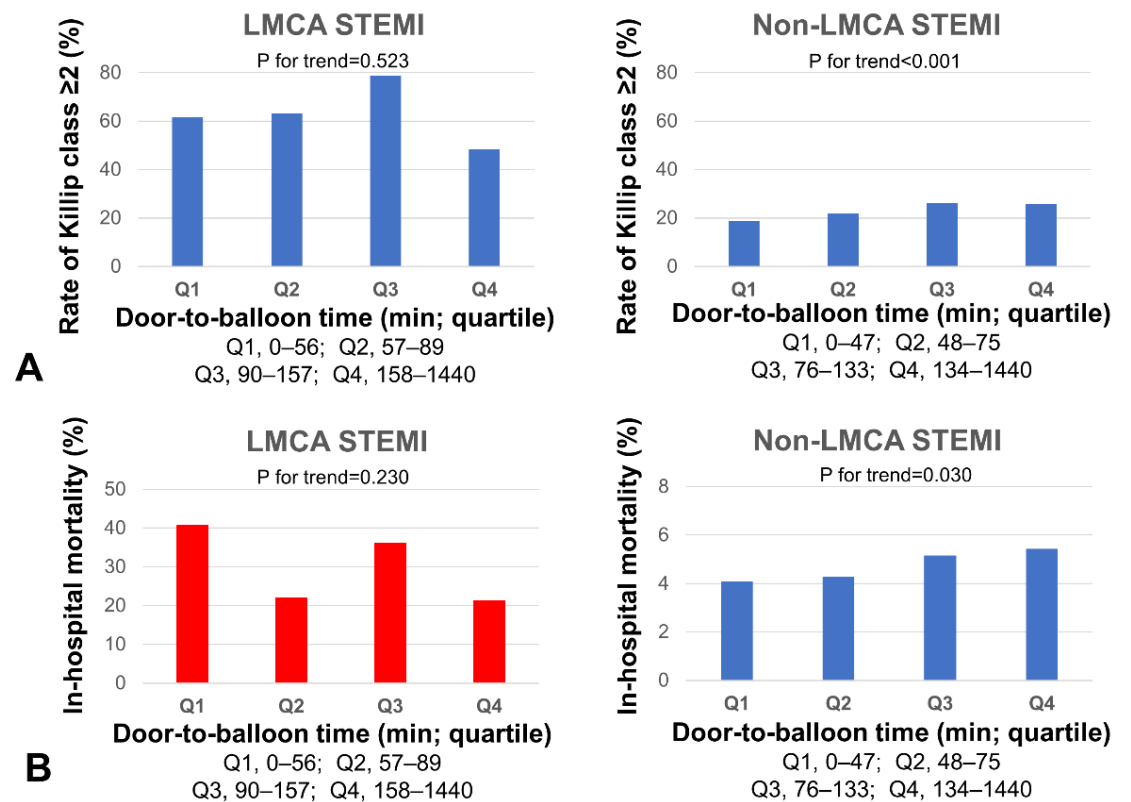

**Supplementary Figure 2.** Distribution of (A) Killip class  $\geq 2$  and (B) in-hospital mortality in according to door-to-balloon time quartiles (Q) in patients with (Left) left main coronary artery (LMCA) ST-segment elevation myocardial infarction (STEMI) and (Right) non-LMCA STEMI.
